# Supplementary material for: Teachers’ working time as a risk factor for their mental health - findings from a cross-sectional study at German upper-level secondary schools
Source: Springer Nature journal article supplement (doi:10.1186/s12889-022-12680-5), 2022-02-14
Supplement: MOESM1 [file 20131072]

## Online questionnaire

Dear teachers, dear colleagues,

This questionnaire contains questions about your current **personal** and **work-related situation**. The questionnaire completes the working time protocol and examines the extent of the working load at German upper-level secondary schools.

First of all, please tick in the following table in which **federal state** you teach!

|   |                   |   |                        |    |                     |    |                    |
|---|-------------------|---|------------------------|----|---------------------|----|--------------------|
| 1 | Baden-Württemberg | 5 | Bremen                 | 9  | Niedersachsen       | 13 | Sachsen            |
| 2 | Bayern            | 6 | Hamburg                | 10 | Nordrhein-Westfalen | 14 | Sachsen-Anhalt     |
| 3 | Berlin            | 7 | Hessen                 | 11 | Rheinland-Pfalz     | 15 | Schleswig-Holstein |
| 4 | Brandenburg       | 8 | Mecklenburg-Vorpommern | 12 | Saarland            | 16 | Thüringen          |

### General information about your professional activity

Some questions may not apply exactly to your situation, as not all country-specific characteristics can be covered in one questionnaire. Nevertheless, please **always give an answer**, namely **the one** which, in case of doubt, **applies most closely to you**.

Please note that your answers sometimes refer to **teaching hours (à 45 minutes)** and sometimes to **time hours (à 60 minutes)**!

---

1.1 Have you **studied grammar school teaching** or do you have a **teaching qualification** (according to the law of the former GDR) **up to the university entrance qualification** (Abitur)?

<sub>0</sub> no      <sub>1</sub> yes

Have you studied **another type of teaching**?

<sub>0</sub> no      <sub>1</sub> yes

If **both questions** are answered **negative**:

What did your transverse entry look like?

<sub>1</sub> Trainee teacher

<sub>2</sub> Further training

<sub>3</sub> Other entry: what? Please specify! \_\_\_\_\_

If **a question** is answered with **yes**:

For which **school subjects** are you **trained**?

Subject 1: \_\_\_\_\_

Subject 2: \_\_\_\_\_

Subject 3: \_\_\_\_\_

---

1.2 For how many **years** ...

- have you been **working as a teacher** (not including your traineeship)? \_\_\_\_\_ years

- have you been **working at your current school**? \_\_\_\_\_ years

---

1.3 In which **type of employment** are you employed?

<sub>1</sub> Civil servants

<sub>2</sub> Other employees

---

1.4 Is this **employment** a ...

<sub>1</sub> Permanent employment?

<sub>2</sub> Temporary employment?

---

1.5 What is the **number of compulsory hours** for you in a **full-time** position?  
(without credit / reduction hours) \_\_\_\_\_ lessons

---

1.6 Please imagine a "normal" school week in the school year. What is your **weekly number of ...**

- Lessons: \_\_\_\_\_ lessons (á 45 minutes)
  - Substitute lessons: \_\_\_\_\_ lessons (á 45 minutes)
  - Free lessons (free periods between lessons) \_\_\_\_\_ lessons (á 45 minutes)
- 

- **Preparation** (e.g. class tests, exams) and **follow-up** time of lessons (without corrections) \_\_\_\_\_ hours
  - **Corrections** (e.g. class tests) and **grading of pupils' works** (e.g. exams, tests, homework, subject-specific works) \_\_\_\_\_ hours
  - **Time** required to carry out **projects, excursions, class trips, pupil exchanges** \_\_\_\_\_ hours
  - **Extracurricular work with pupils** (e.g. pupil counselling, conversations regarding pupil education, communication) and **co-operation with parents** (e.g. parents' evenings, class activities, presentation days) \_\_\_\_\_ hours
  - **Administrative tasks** and **organisational matters** (e.g. certifications, planning of events, class trips or projects, orders, protocols, certificate conferences, archiving exams) \_\_\_\_\_ hours
  - **Teamwork** and **dialogue with colleagues, co-operation with colleagues** (e.g. expert conferences, expert discussions, arrangements) \_\_\_\_\_ hours
  - **Tasks** within the scope of pupils' **inclusion** (e.g. preparation and follow-up time of lessons, specific advanced trainings, internal differentiation) \_\_\_\_\_ hours
  - **Tasks** within the scope of pupils' **integration** (e.g. preparation and follow-up time of lessons, specific advanced trainings, internal differentiation) \_\_\_\_\_ hours
  - **Supervision** times during breaks \_\_\_\_\_ hours
  - **All other tasks** (e.g. all-day school activities, evaluations, safety officer, maintenance of technology, training courses, mentoring, commission membership, staff council activities, care of a subject collection, use of advisory services and public authorities, work as subject chairperson, etc.) \_\_\_\_\_ hours
- 

1.7 Do you work **part-time / partial retirement**? <sub>0</sub> no <sub>1</sub> yes

If you work **part-time / partial retirement**:

How many **years** have you been working **part-time / partial retirement**? \_\_\_\_\_ years

What is the **main reason** for this?

- <sub>1</sub> High workload
  - <sub>2</sub> Health reasons
  - <sub>3</sub> High importance of my free time
  - <sub>4</sub> High private burdens (e.g. childcare, care of a relative)
  - <sub>5</sub> Other reason: what? Please specify!  
\_\_\_\_\_
-

**Specific information about your teaching activities**

2.1 Which of the following tasks are you responsible for in addition to teaching?  
(multiple answers possible)

- \_0 No additional tasks
- \_1 **Headmaster/ Deputy Headmaster**
- \_2 **Coordinator** (member of the school management or **of the extended school management** (e.g. head of the upper school))
- \_3 **Functional position beyond the scope of the school** (e.g. expert advisor, expert leader in training)
- \_4 **Additional tasks with or without a functional position** (e.g. safety officer, equipment maintenance, subject supervisor, collection manager)
- \_5 **Head of class, tutor**
- \_6 **Other tasks** (e.g. school organisation, work in school committees)  
What? Please specify! \_\_\_\_\_

2.2 How much **time per week** do **these tasks** (question 2.1) take in a 'normal' school week in the school year? \_\_\_\_\_ hours

2.3 How many **credit / reduction hours** do you receive for these tasks (question 2.1)?  
\_\_\_\_\_ lessons (no reduction hours = 0 lessons)

2.4 Do you receive **credit / reduction hours** (e.g. age reduction, certain subjects, further training) **independently of these tasks** (question 2.1)? \_0 no \_1 yes

If **yes**, how **many** and for **what**:

| Number of lessons | Credit / reduction hours for ... |
|-------------------|----------------------------------|
| <i>e.g. 2</i>     | <i>e.g. age reasons</i>          |
|                   |                                  |
|                   |                                  |

2.5 Please provide the following information about the classes you teach. How many ... **Number**

- **classes** do you teach in a **normal school week**? \_\_\_\_\_
- **pupils** are there in a **class on average**? \_\_\_\_\_
- **pupils** do you teach with a **migration background** without sufficient knowledge of German? \_\_\_\_\_
- **pupils** do you teach in the context of **inclusion**? \_\_\_\_\_

---

2.6 How many **additional hours** do you need per week for **inclusion tasks**  
(e.g. preparation and follow-up, differentiation within a class, tutoring)? \_\_\_\_\_ hours

How many **additional hours** do you need per week for **integration tasks**  
(e.g. preparation and follow-up, differentiation within a class, tutoring)? \_\_\_\_\_ hours

---

2.7 What **subjects** do you **teach**?

Subject 1: \_\_\_\_\_ Subject 3: \_\_\_\_\_  
Subject 2: \_\_\_\_\_ Subject 4: \_\_\_\_\_

---

2.8 **Have you been employed in the last two years in a subject, for which you are not trained?**

<sub>0</sub> no <sub>1</sub> yes **If yes:** At your own request? <sub>0</sub> no <sub>1</sub> yes

---

2.9 According to your **timetable**, how much **time per week** are **"long" breaks**  
(= longer than 10 minutes)? (without free, intermediate and super-visory hours) \_\_\_\_\_ minutes

How much **time per week** do you use **for recreation**? \_\_\_\_\_ minutes

How many **free, intermediate hours** do you have in your **timetable per week**? \_\_\_\_\_ lessons

How many **free, intermediate hours** do you use **for recreation per week**? \_\_\_\_\_ lessons

Do you need **more recreation time** in your school day? <sub>0</sub> no <sub>1</sub> yes

---

2.10 **Are you currently participating in a regular, job-specific further education?** <sub>0</sub> no <sub>1</sub> yes

**If yes:** How many **hours per month** do you invest in it? \_\_\_\_\_ hours

---

### General information about yourself and your free time

3.1 **Sex:** <sub>1</sub> male <sub>2</sub> female **Age:** \_\_\_\_\_ years

---

3.2 **Marital status:** <sub>1</sub> single <sub>2</sub> married <sub>3</sub> widowed.. <sub>4</sub> divorced

**Currently living in a stable partnership:** <sub>0</sub> no <sub>1</sub> yes

---

3.3 **Do you have children?** <sub>0</sub> no <sub>1</sub> yes

**If yes:** How many children are **currently** living in your household? \_\_\_\_\_ children

---

3.4 **Are you currently caring for a relative?** <sub>0</sub> no <sub>1</sub> yes

**If yes:** How much **time** does this take **per week**? \_\_\_\_\_ hours

---

3.5 Do you **regularly** engage in **voluntary activities** (e. g. in clubs, associations, churches, parties or other organisations)? <sub>0</sub> no <sub>1</sub> yes

**If yes:** How much **time** does this take **per week**? \_\_\_\_\_ hours

---
